# Supplementary material
Source: PubMed Central journal article supplement (PMC2785660)
Supplement: supp_M109.038802_jbc.M109.038802-1.pdf [file supp_M109.038802_jbc.M109.038802-1.pdf]

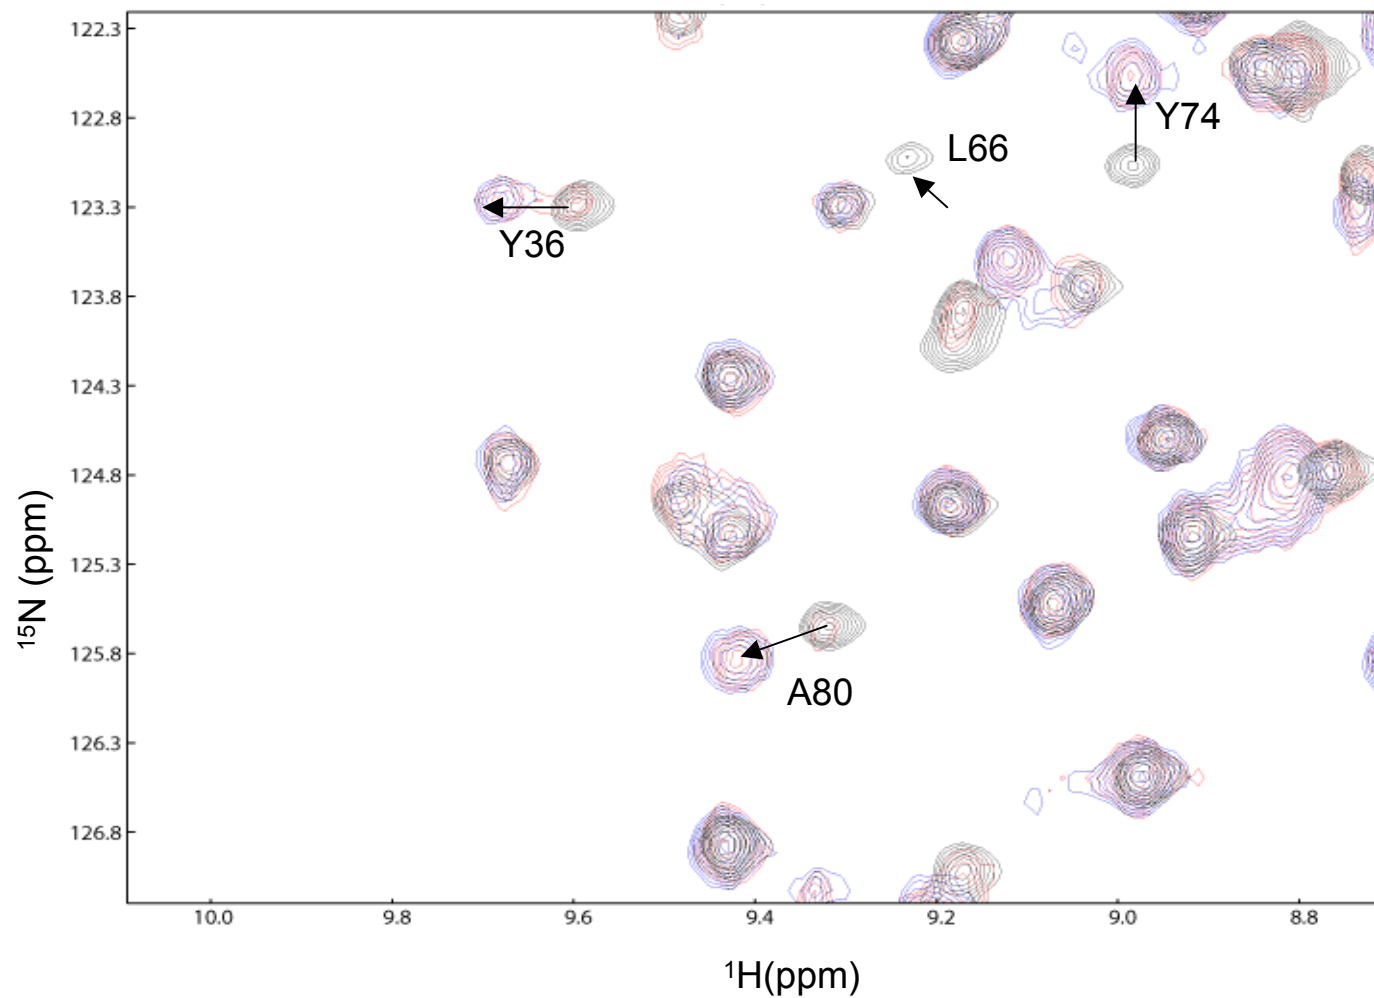

**Supplemental Fig. S1. The  $^1\text{H}$ - $^{15}\text{N}$  HSQC spectra of  $^{15}\text{N}$ -labeled EC-D1D2.**

The spectra of free  $^{15}\text{N}$ -labeled EC-D1D2 (grey), and  $^{15}\text{N}$ -labeled EC-D1D2 mixed with KLRG1 at 70  $\mu\text{M}$  (red) and 140  $\mu\text{M}$  (blue). Black arrows show representative peak of chemical shift changed residues and disappeared residues.

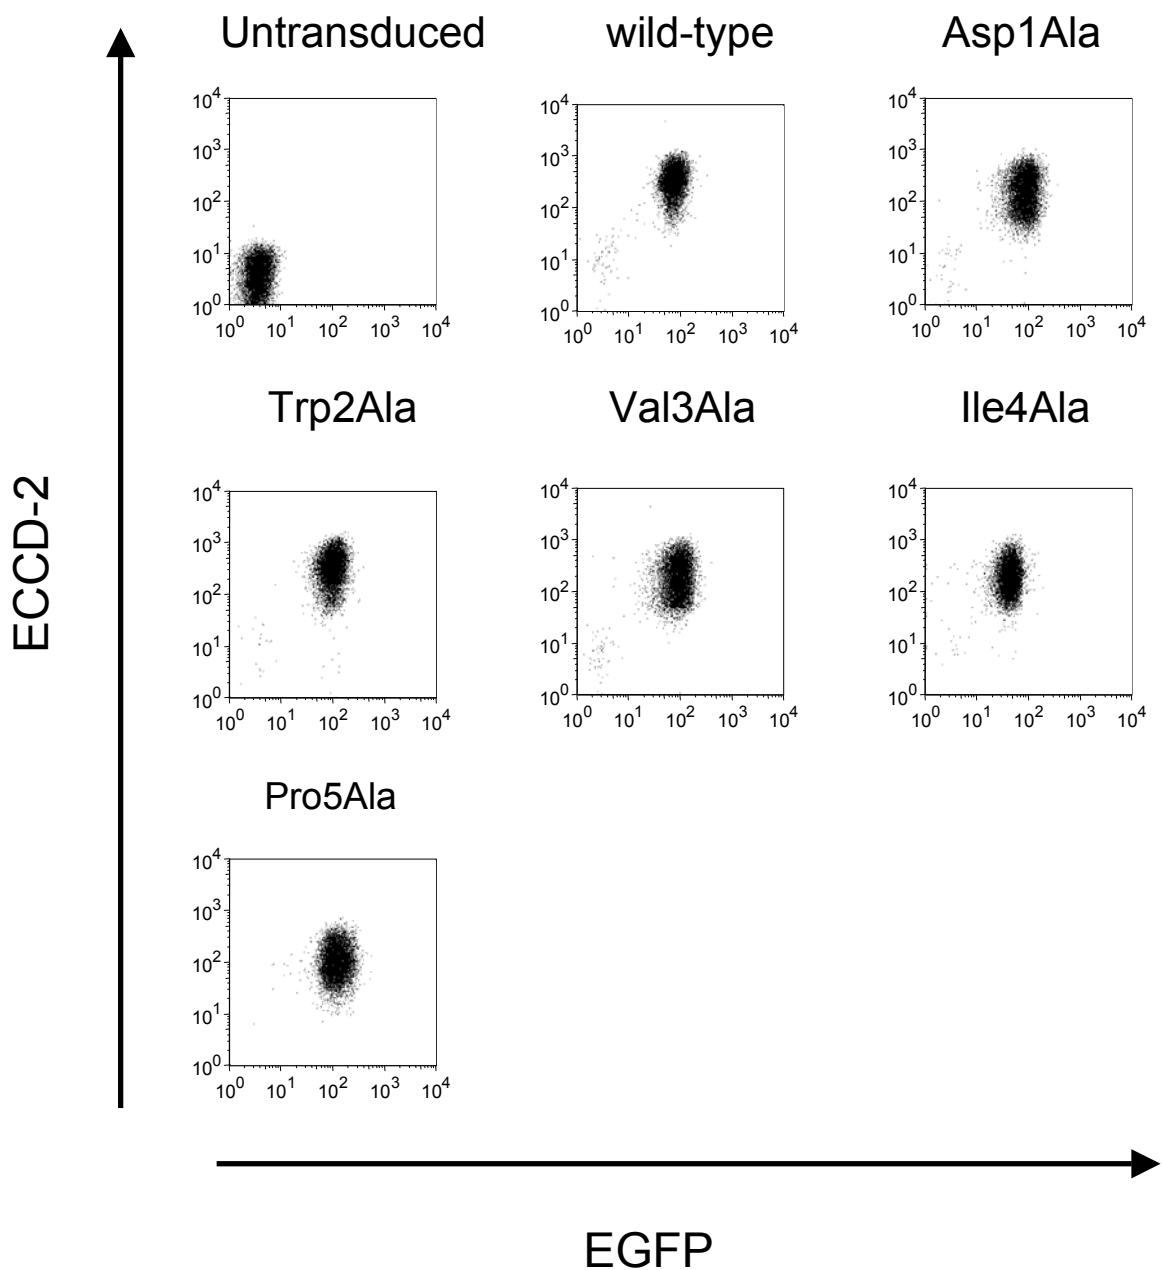

**Supplemental Fig. S2. Flow cytometry analysis of E-cadherin expression on BW5147 cells.**

BW5147 cells were retrovirally transduced with the expression vector for wild-type or mutant E-cadherin together with EGFP. The cells were stained with anti-mouse E-cadherin antibody, ECCD-2, and goat anti-mouse IgG(H+L)-PE.

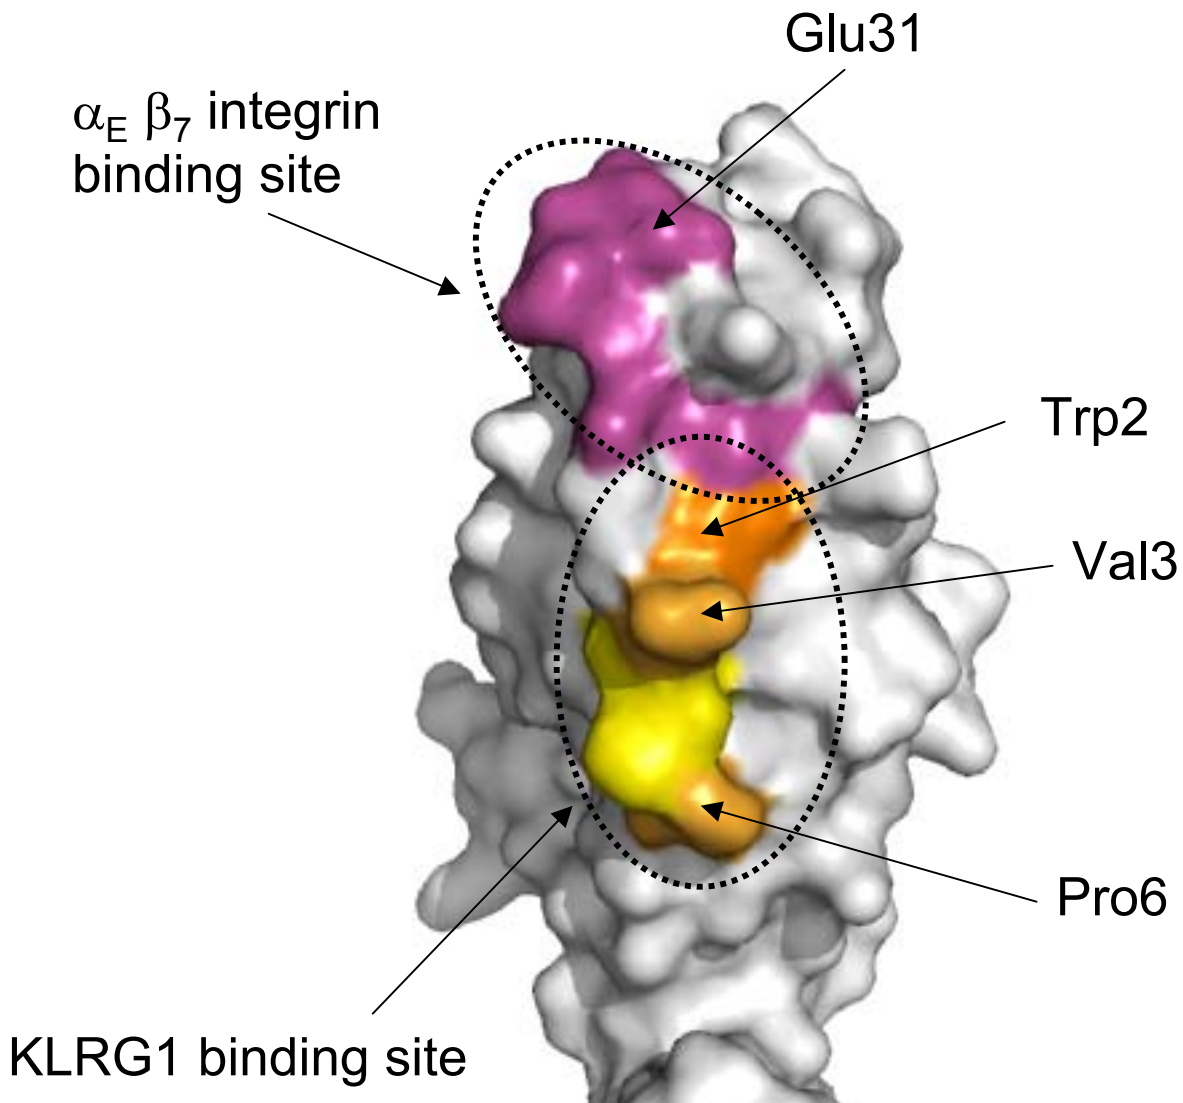

**Supplemental Fig. S3. KLRG1 and  $\alpha_E \beta_7$  integrin binding sites on E-cadherin.**

Mapping of KLRG1 and  $\alpha_E \beta_7$  integrin binding sites on the structure of E-cadherin domain 1. Orange, light orange and yellow area indicate KLRG1 binding site and magenta area indicate  $\alpha_E \beta_7$  integrin binding site, respectively.

**Supplemental Table S1. Binding analysis of KLRG1 to E-cadherins using SPR.**

| immobilized ligand                     | analytes     | Kd ( $\mu$ M) 25°C |                    |
|----------------------------------------|--------------|--------------------|--------------------|
|                                        |              | +Ca <sup>2+</sup>  | -Ca <sup>2+</sup>  |
| KLRG1                                  | EC-D1D2      | 7                  | 12                 |
|                                        | EC-D2D3      | N.B                | N.B                |
| Other cell-cell recognition molecules* |              |                    | Ref.               |
| PILR $\alpha$                          | CD99         | 2.2                | (1)                |
| LILRB1/2                               | peptide-MHC  | 2 - 50             | (2) (3)<br>(4) (5) |
| KIR2DL3                                | HLA-Cw7/DS11 | 5.2                | (6)                |
| CD8 $\alpha\alpha$                     | MHC class I  | ~200               | (7)                |
| CD22                                   | CD45         | 117                | (8)                |
| CD80                                   | CTLA-4       | 0.46               | (9)                |
| CD80                                   | CD28         | 2.4                | (9)                |
| Fc $\gamma$ RIIa,IIb,III               | hFc1         | 0.72 - 1.9         | (10)               |
| TCR                                    | peptide-MHC  | 1 - 90             | (11) (12)          |

N.B, No Binding.

The ligand is the protein immobilized on the research-grade CM5 chip, and the analyte is injected in solution. \*The left and right columns indicate receptors and ligands, respectively.

## REFERENCES

1. Tabata, S., Kuroki, K., Wang, J., Kajikawa, M., Shiratori, I., Kohda, D., Arase, H. & Maenaka, K. (2008) *J Biol Chem* **283**, 8893-901.
2. Chapman, T. L., Heikeman, A. P. & Bjorkman, P. J. (1999) *Immunity* **11**, 603-13.
3. Shiroishi, M., Kuroki, K., Rasubala, L., Tsumoto, K., Kumagai, I., Kurimoto, E., Kato, K., Kohda, D. & Maenaka, K. (2006) *Proc Natl Acad Sci U S A* **103**, 16412-7.
4. Shiroishi, M., Kuroki, K., Tsumoto, K., Yokota, A., Sasaki, T., Amano, K., Shimojima, T., Shirakihara, Y., Rasubala, L., van der Merwe, P. A., Kumagai, I., Kohda, D. & Maenaka, K. (2006) *J Mol Biol* **355**, 237-48.
5. Shiroishi, M., Tsumoto, K., Amano, K., Shirakihara, Y., Colonna, M., Braud, V. M., Allan, D. S., Makadzange, A., Rowland-Jones, S., Willcox, B., Jones, E. Y., van der Merwe, P. A., Kumagai, I. & Maenaka, K. (2003) *Proc Natl Acad Sci U S A* **100**, 8856-61.
6. Maenaka, K., Juji, T., Nakayama, T., Wyer, J. R., Gao, G. F., Maenaka, T., Zaccari, N. R., Kikuchi, A., Yabe, T., Tokunaga, K., Tadokoro, K., Stuart, D. I., Jones, E. Y. & van der Merwe, P. A. (1999) *J Biol Chem* **274**, 28329-34.
7. Gao, G. F., Willcox, B. E., Wyer, J. R., Boulter, J. M., O'Callaghan, C. A., Maenaka, K., Stuart, D. I., Jones, E. Y., Van Der Merwe, P. A., Bell, J. I. & Jakobsen, B. K. (2000) *J Biol Chem* **275**, 15232-8.
8. Bakker, T. R., Piperi, C., Davies, E. A. & Merwe, P. A. (2002) *Eur J Immunol* **32**, 1924-32.
9. van der Merwe, P. A., Bodian, D. L., Daenke, S., Linsley, P. & Davis, S. J. (1997) *J Exp Med* **185**, 393-403.
10. Maenaka, K., van der Merwe, P. A., Stuart, D. I., Jones, E. Y. & Sonderrmann, P. (2001) *J Biol Chem* **276**, 44898-904.
11. Willcox, B. E., Gao, G. F., Wyer, J. R., Ladbury, J. E., Bell, J. I., Jakobsen, B. K. & van der Merwe, P. A. (1999) *Immunity* **10**, 357-65.
12. Boniface, J. J., Reich, Z., Lyons, D. S. & Davis, M. M. (1999) *Proc Natl Acad Sci U S A* **96**, 11446-51.
